# Supplementary material for: Retention of trivalent actinides (Am, Cm) and lanthanides (Eu) by Ca feldspars
Source: Copernicus journal article supplement (doi:10.5194/sand-2-161-2023), 2023-09-06
Supplement: Supplementary file 1 [file sand-2-161-2023-supplement.zip]

# Retention of Trivalent Actinides and Lanthanides by Feldspars

## Retention Mechanism

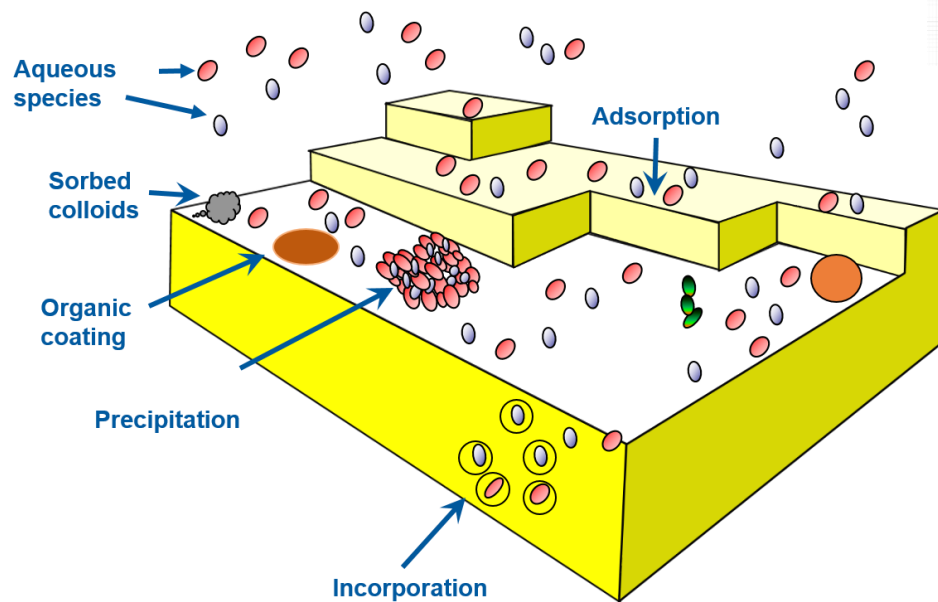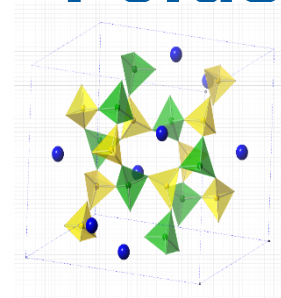

Al  
Si  
Ca / K / Na

Quantification

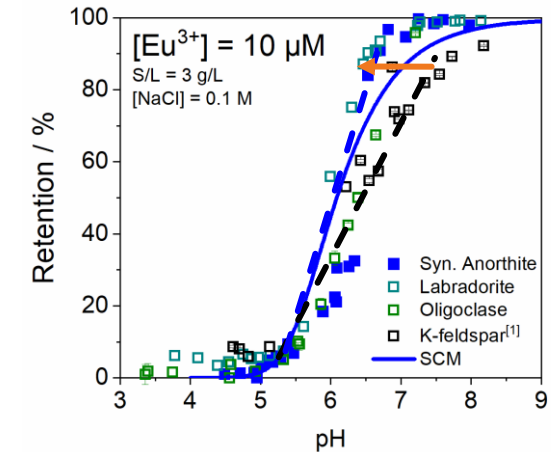

Interfacial Structure

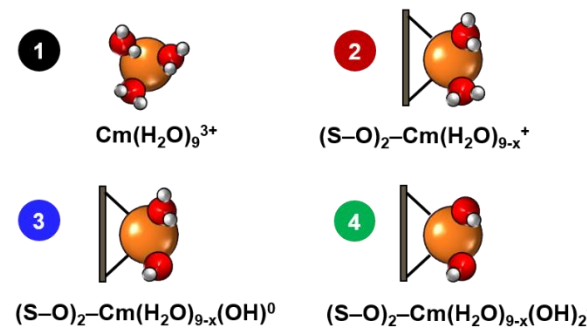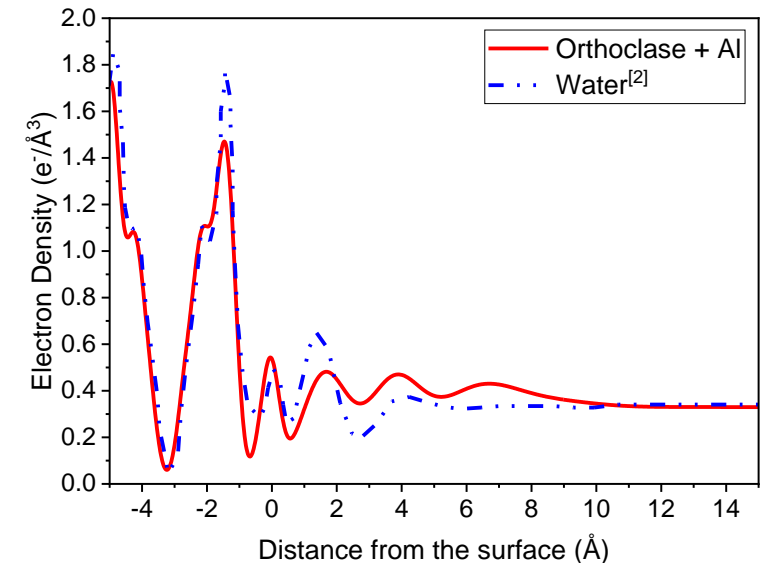

More information at Poster  
Session II  
**S11**
