# Supplementary material for: Retention of trivalent actinides (Am, Cm) and lanthanides (Eu) by Ca feldspars
Source: Copernicus journal article supplement (doi:10.5194/sand-2-161-2023), 2023-09-06
Supplement: Supplementary file 2 [file sand-2-161-2023-supplement.zip]

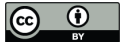

*Supplement of*

## **Retention of trivalent actinides (Am, Cm) and lanthanides (Eu) by Ca feldspars**

**Jessica Lessing et al.**

*Correspondence to:* Jessica Lessing (j.lessing@hzdr.de)

- sand-2-161-2023-supplement-title-page.pdf
- sand-2023-106\_PitchSlide\_SafeND\_Lessing.pdf
- sand-2023-106\_Poster\_Lessing\_SafeND2023\_korr.pdf

The copyright of individual parts of the supplement might differ from the article licence.
