# Supplementary material for: Retention of trivalent actinides (Am, Cm) and lanthanides (Eu) by Ca feldspars
Source: Copernicus journal article supplement (doi:10.5194/sand-2-161-2023), 2023-09-06
Supplement: Supplementary file 3 [file sand-2-161-2023-supplement.zip]

Archive with 3 entries (3 files):
- sand-2023-106_PitchSlide_SafeND_Lessing.pdf
- sand-2023-106_Poster_Lessing_SafeND2023_korr.pdf
- sand-2-161-2023-supplement-title-page.pdf
