# Supplementary material for: Retention of trivalent actinides (Am, Cm) and lanthanides (Eu) by Ca feldspars
Source: Copernicus journal article supplement (doi:10.5194/sand-2-161-2023), 2023-09-06
Supplement: Supplementary file 3 [file sand-2-161-2023-supplement.zip › sand-2023-106_Poster_Lessing_SafeND2023_korr.pdf]

# Retention of Trivalent Actinides and Lanthanides by Feldspars

J. Lessing<sup>1</sup>, J. Neumann<sup>1,2</sup>, J. P. Bezzina<sup>1</sup>, F. Bok<sup>1</sup>, J. Lützenkirchen<sup>2</sup>, V. Brendler<sup>1</sup>, T. Stumpf<sup>1</sup>, M. Schmidt<sup>1</sup>

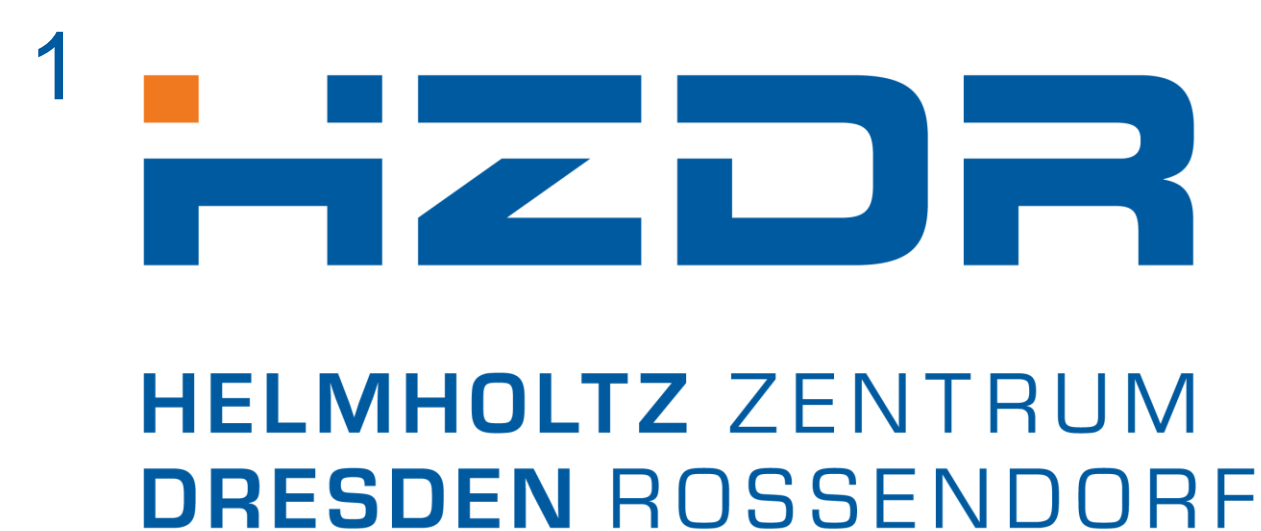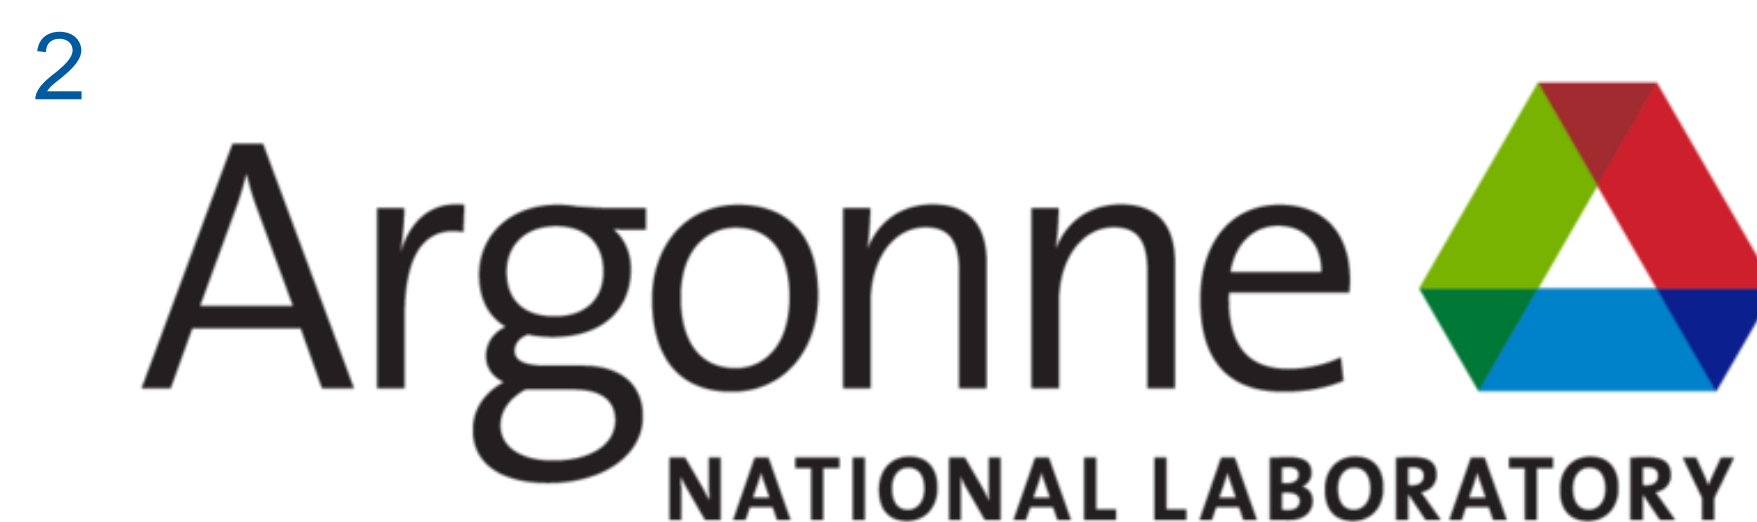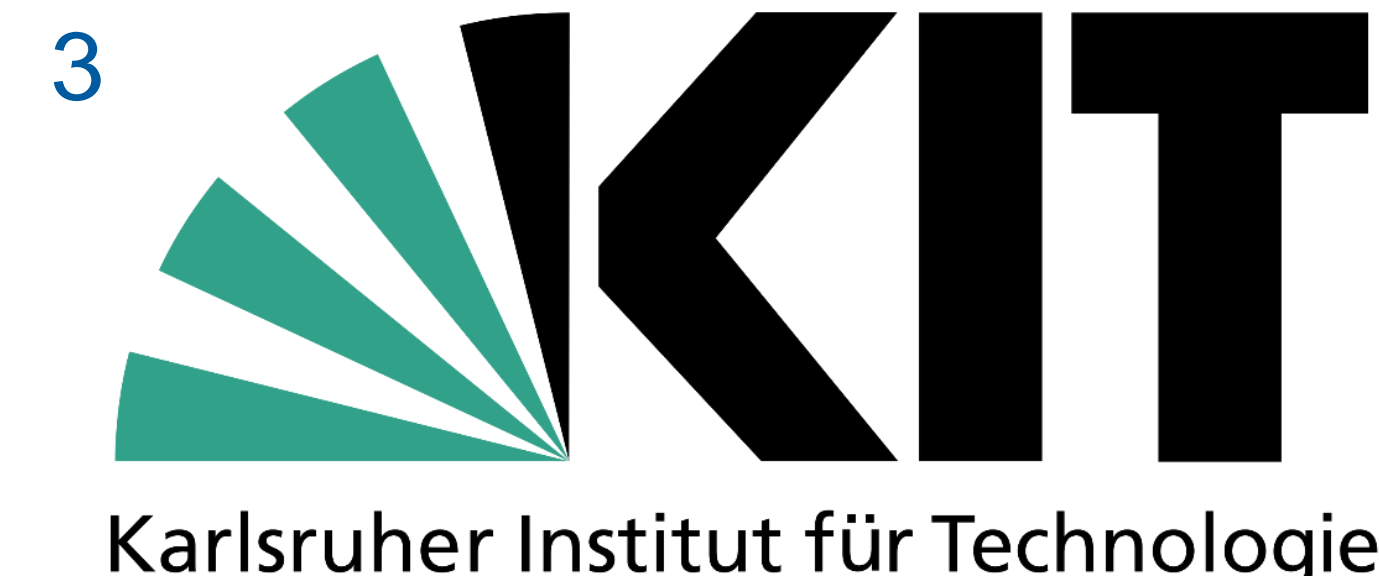

## Motivation

- Possible host rock for deep geological repository for radioactive waste: **crystalline rock**
- Retention of M(III) by feldspars so far only investigated for K- and Na-feldspar<sup>[1,2]</sup>
- Trivalent actinides M(III) (M = Am, Cm) and rare earth elements (Eu) as their analogue

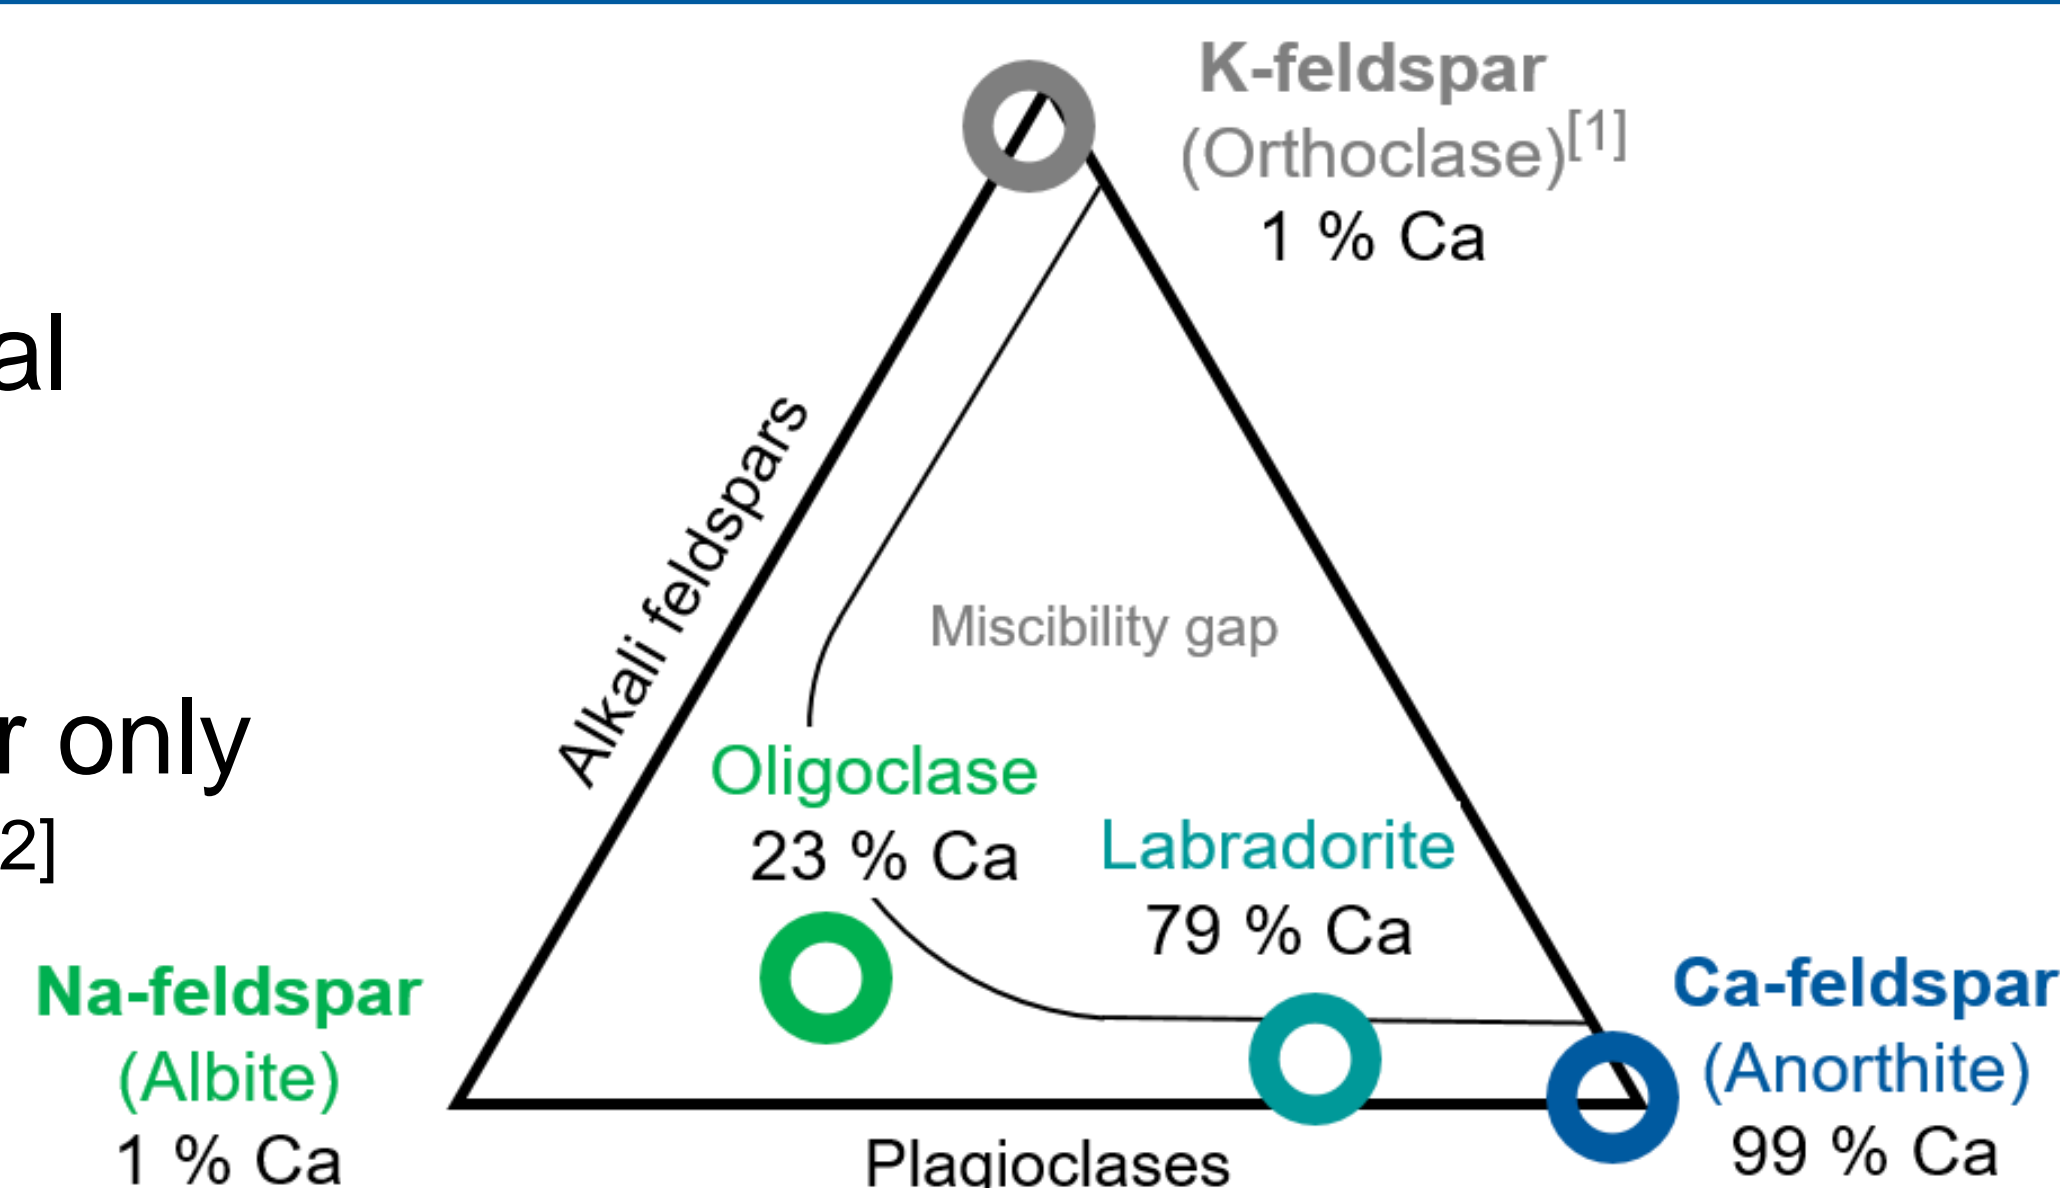

**Figure 1.** Phase diagram of the feldspar series. Plagioclases (=Ca-feldspars) used in this study are marked in circles.

Surface structural and quantitative characterization of sorption of M(III) on feldspars

## Surface charge characterization

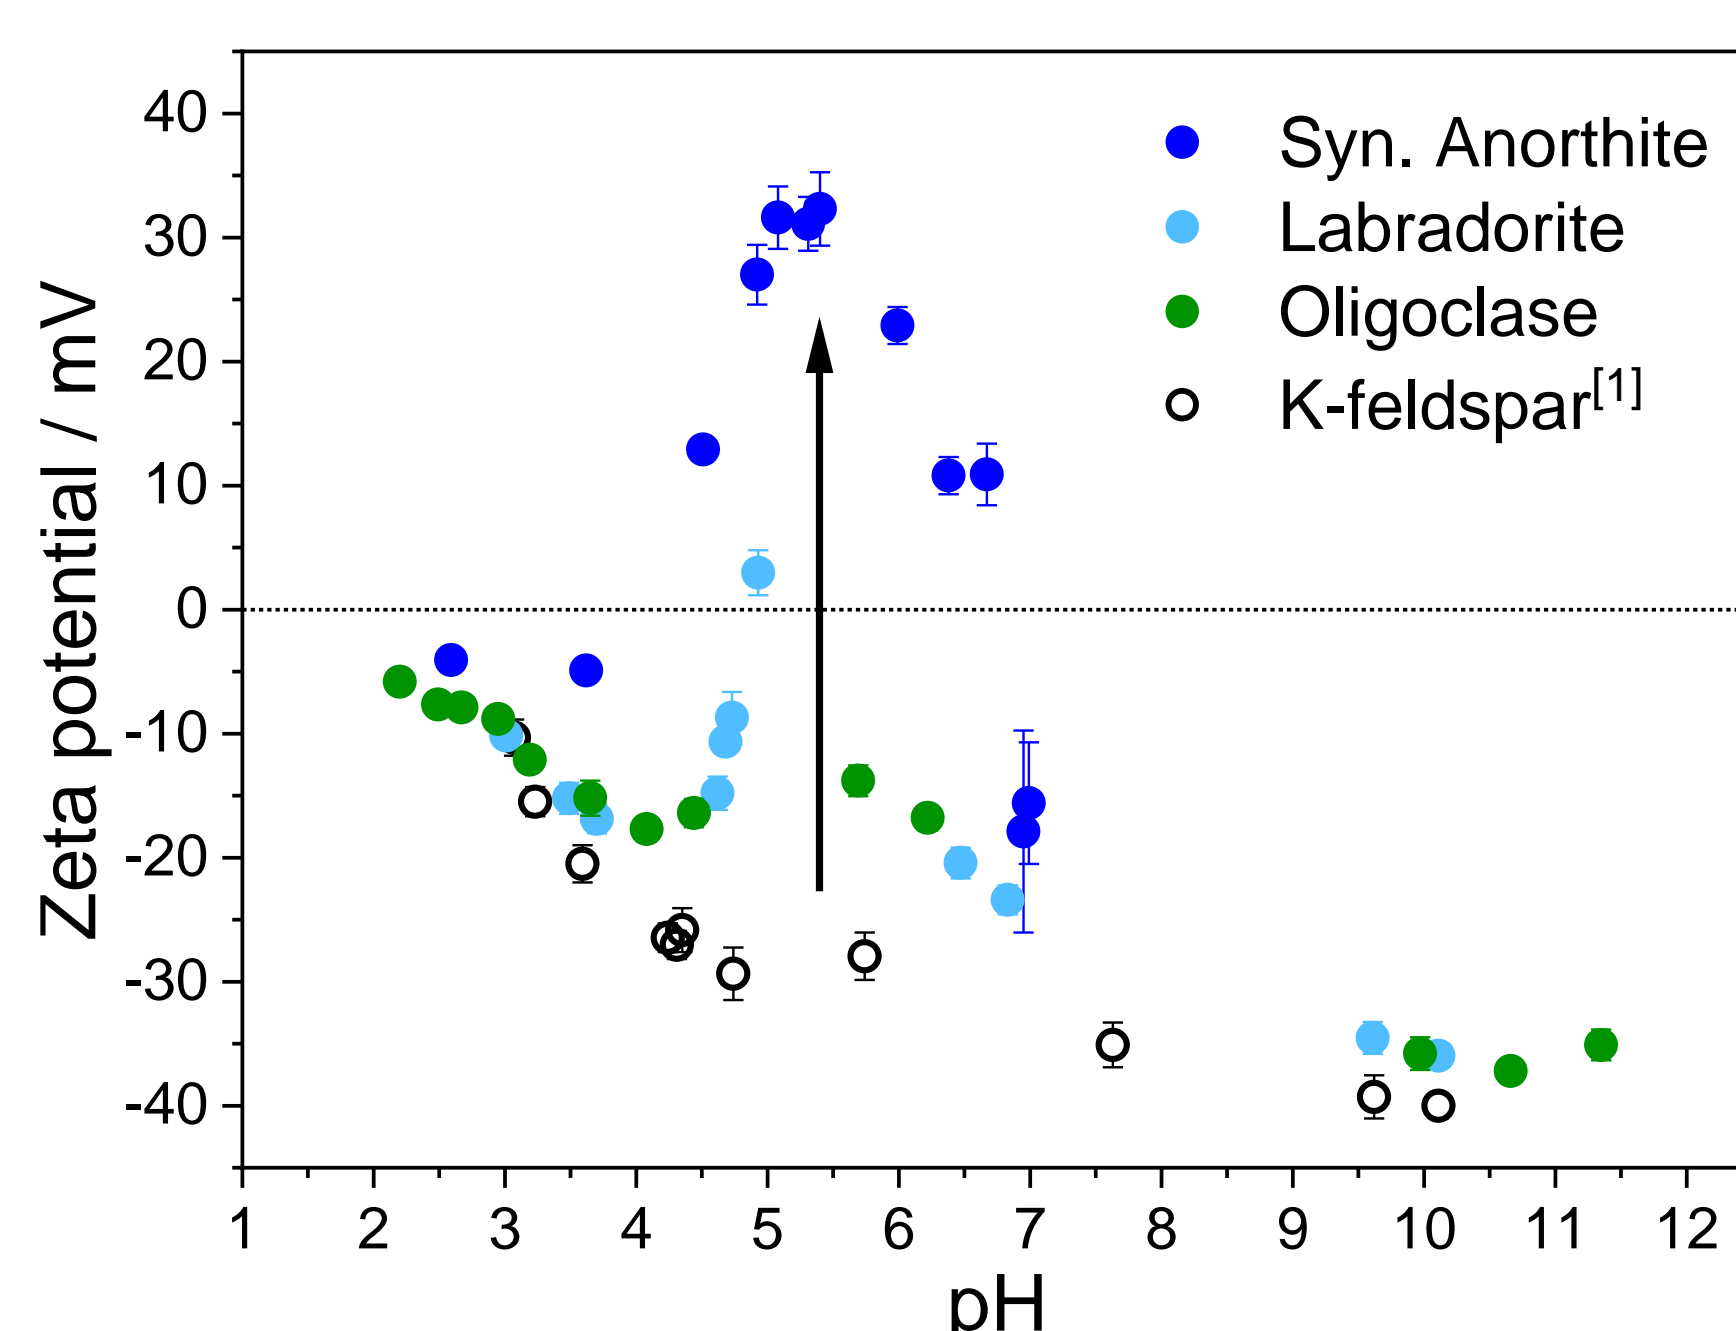

**Figure 2.** Zeta potential of 0.2 g/L feldspars with varying Ca content.

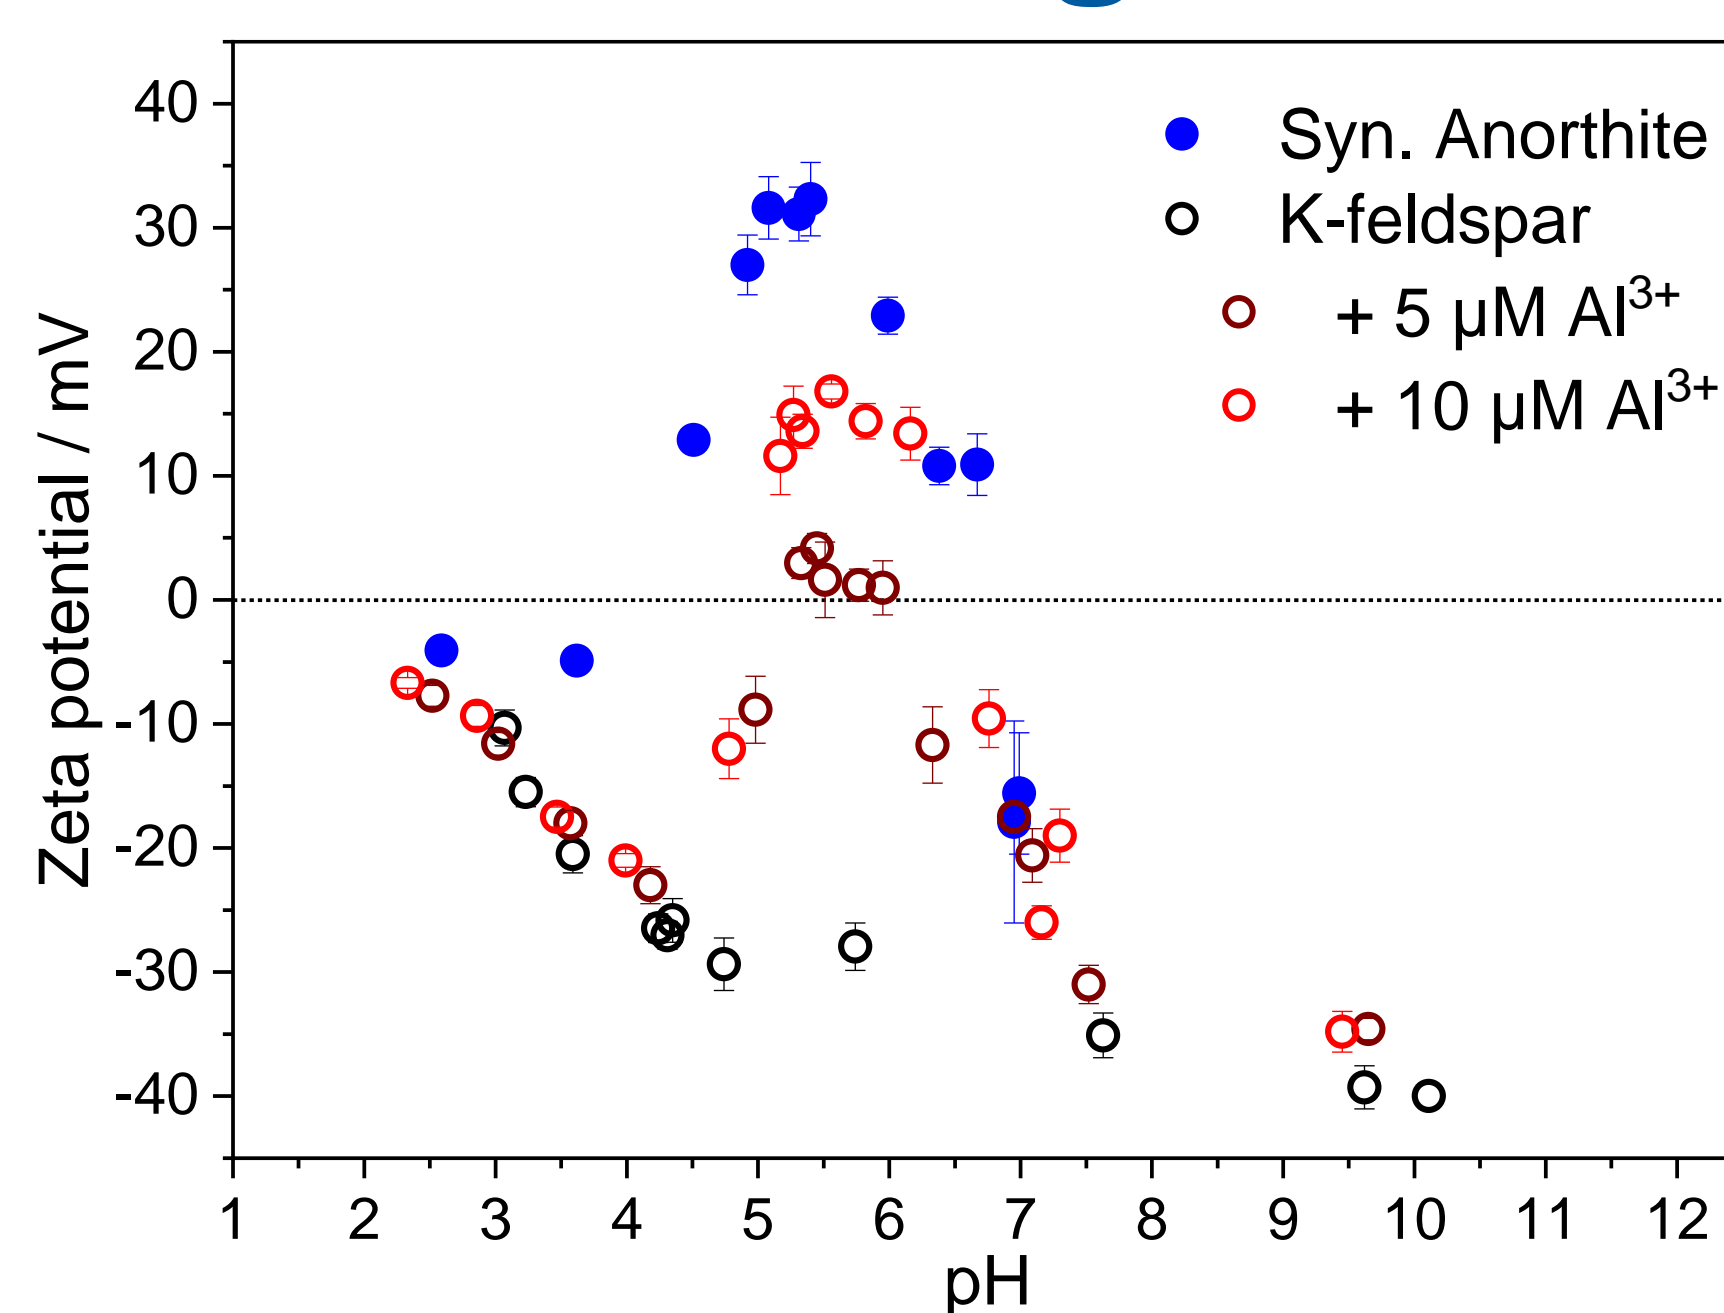

**Figure 3.** Zeta potential of 0.2 g/L feldspars with and without different amounts of Al<sup>3+</sup>.

Impact of Al on sorption of M(III) on minerals?

- Unusual increase of zeta potential for pH 4 – 7
- Probably caused by sorption of Ca<sup>2+</sup> and Al<sup>3+</sup> and/or precipitation of Al phase

## Batch Sorption and Surface Structure

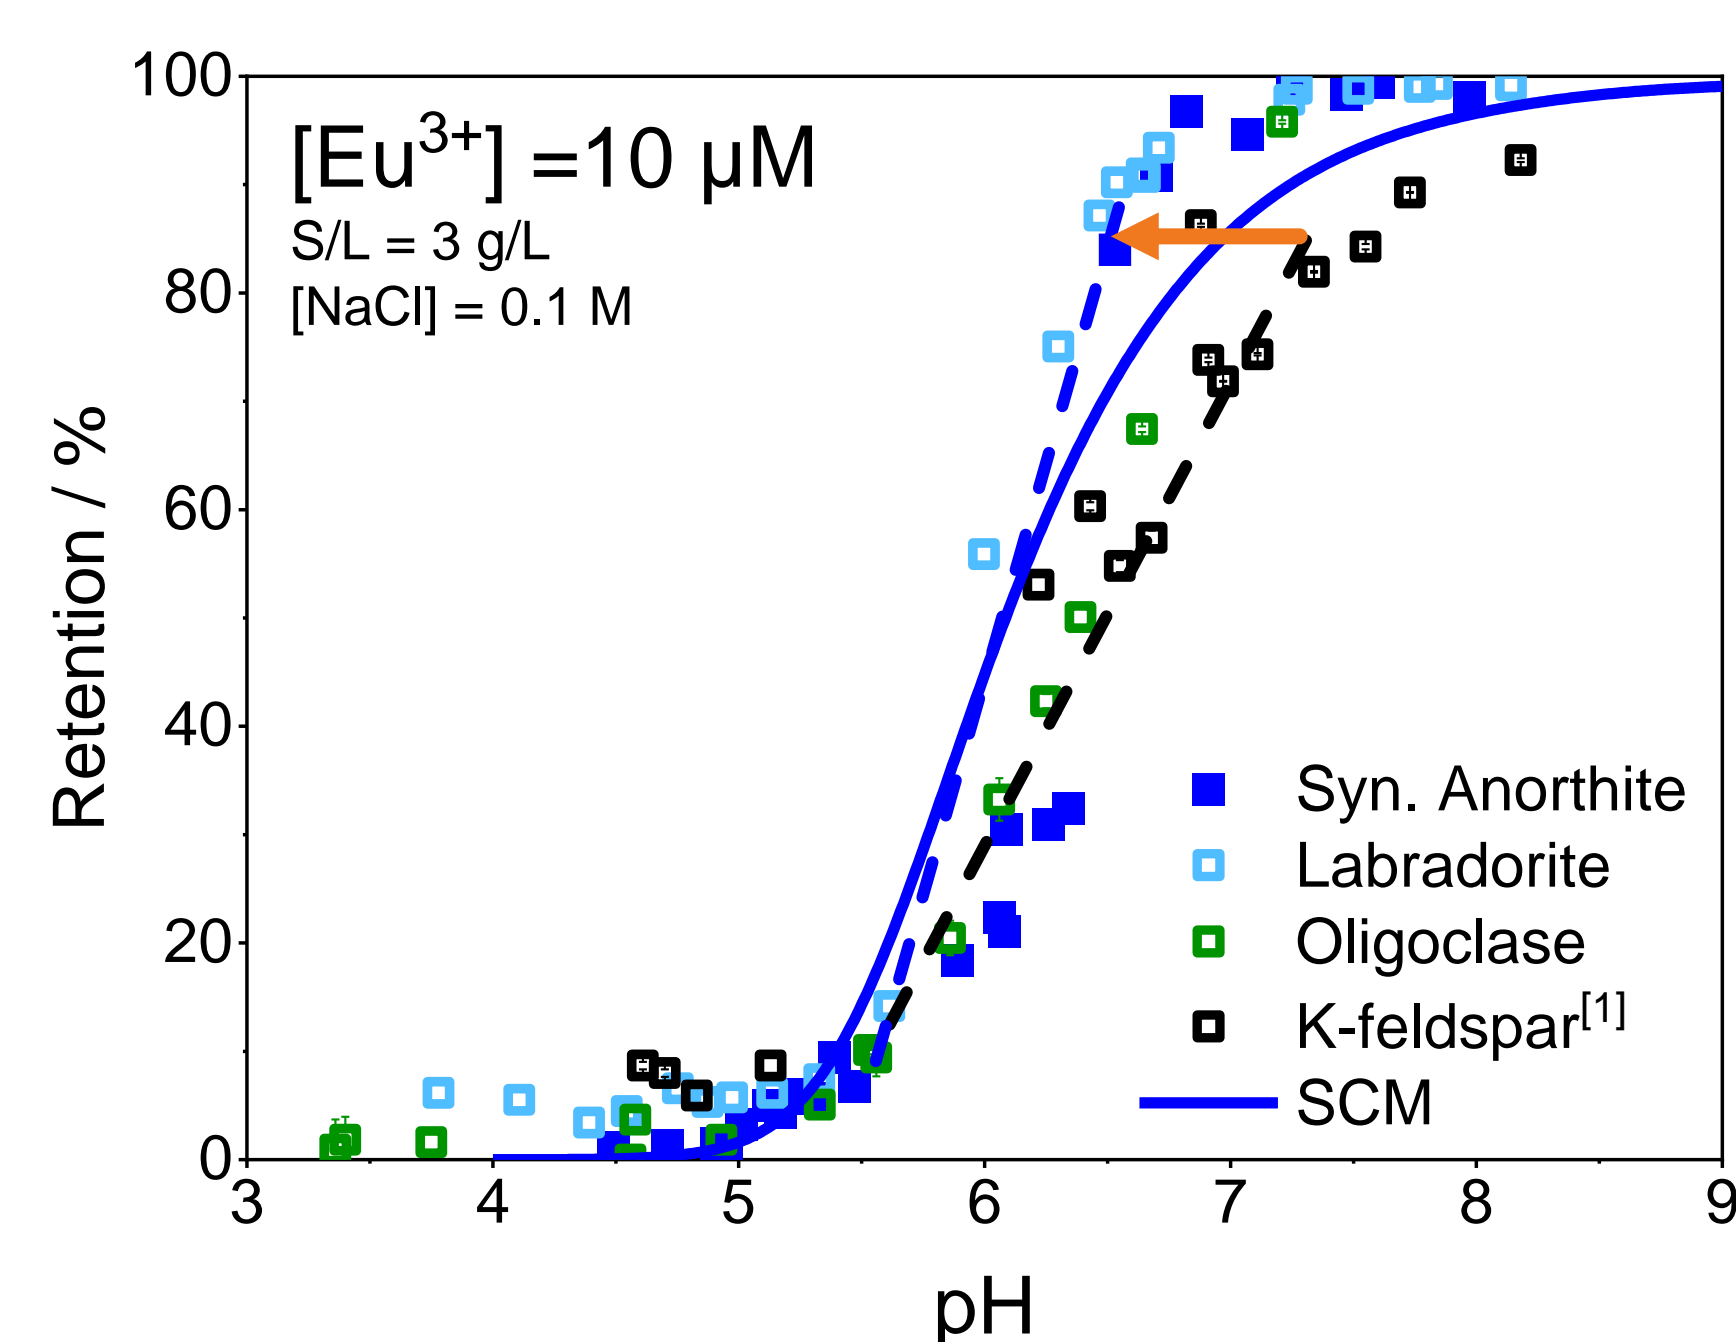

**Figure 4.** Sorption edge of Eu<sup>3+</sup> as analogue for M<sup>3+</sup> on different plagioclases.

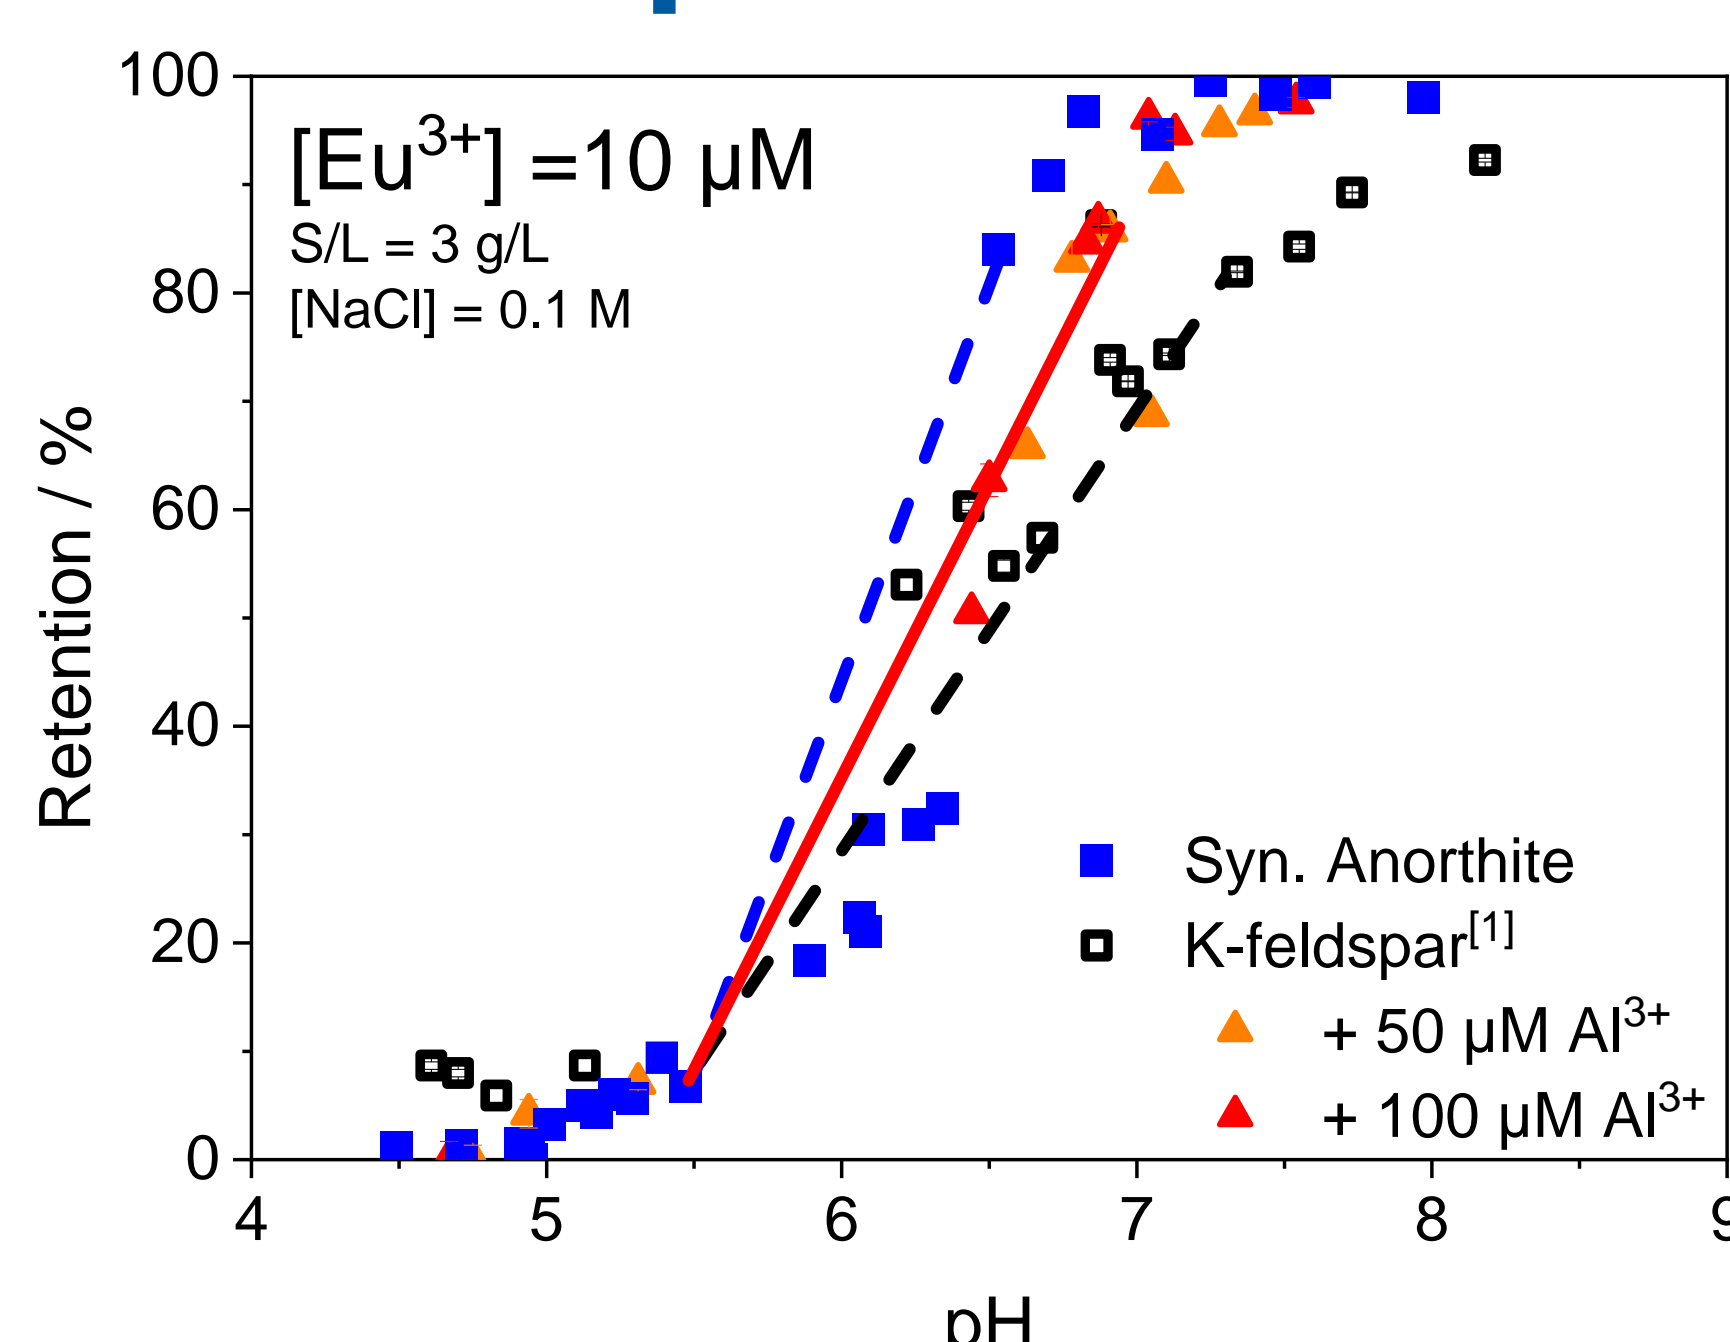

**Figure 5.** Sorption edge of Eu<sup>3+</sup> for K-feldspar with different amounts of added Al<sup>3+</sup>.

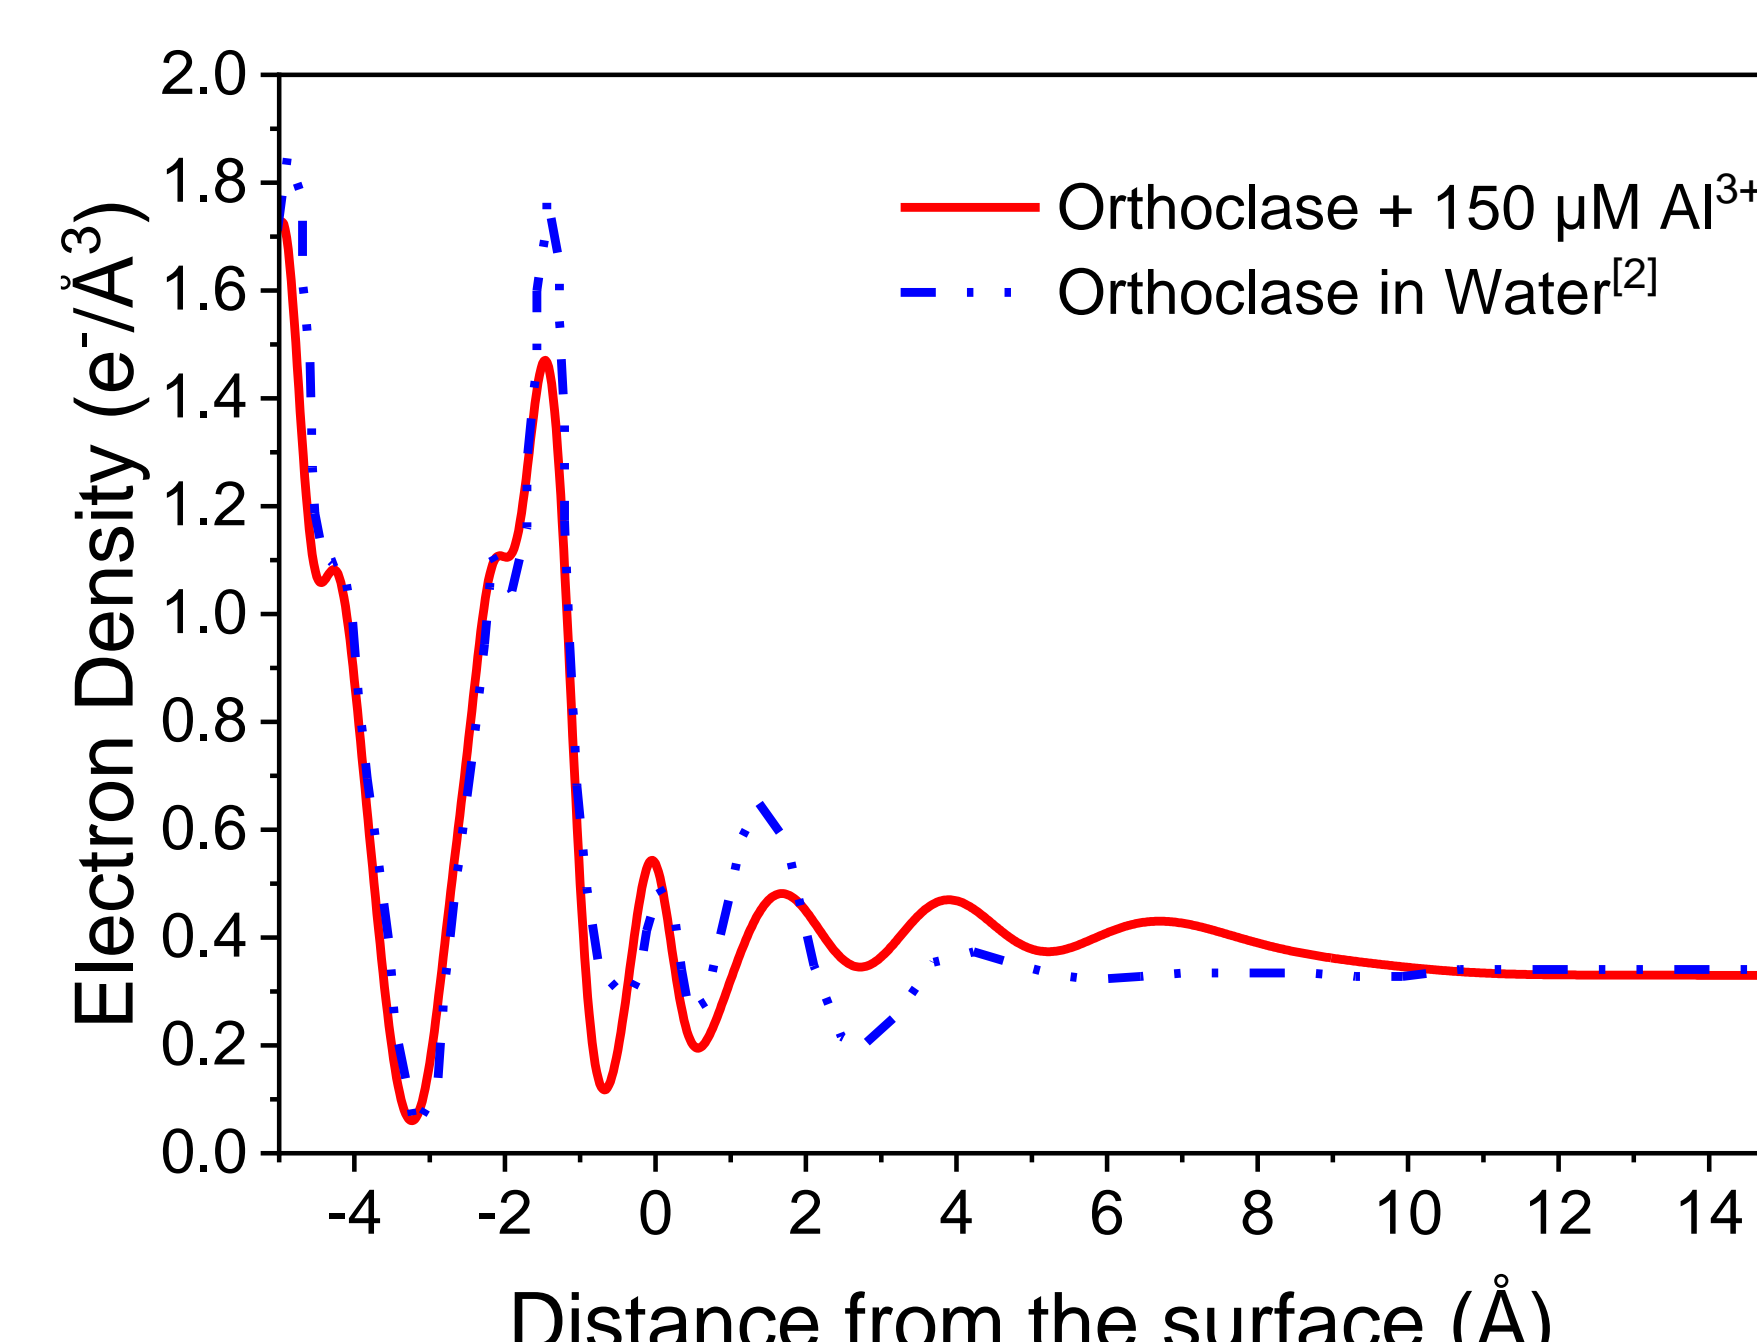

**Figure 6.** X-ray reflectivity of orthoclase with added Al<sup>3+</sup>.

- Ca-feldspars have slightly higher retention potential towards M(III) compared to K-feldspars

- Suggestion: Al-phase forms on surface

- SXD measurements show Al<sup>3+</sup> alters interfacial structure
- No evidence for “crystalline” surface precipitate

## Conclusion

- Zeta potential increases with increasing amount of Ca<sup>2+</sup> in the crystal lattice
- Effect can be traced back to dissolved Al<sup>3+</sup> → SXD reveal interaction of Al<sup>3+</sup> on surface
- Strong sorption uptake of trivalent f-elements for pH > 6

This work was funded by the Federal Ministry of Economics and Technology in the frame of the KuRSiv project with grant 02E12052A.

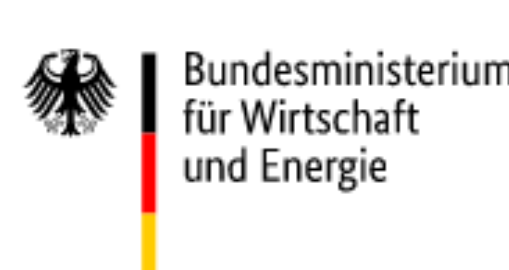

[1] Neumann et al. *J. Colloid Interface Sci.*, **2021**, 591, 490–499.

[2] Stumpf et al. *Radiochim. Acta*, **2006**, 94, 243–248.

[3] Lessing et al. *Natural and synthetic plagioclases: Surface charge characterization and sorption of trivalent lanthanides (Eu) and actinides (Am, Cm)*, in preparation.

[4] Fenter et al. *Geochim. Cosmochim. Acta*, **2003**, 67, 4267–4275.
